# Supplementary material
Source: PubMed Central journal article supplement (PMC3675913)
Supplement: AEM.03945-12_zam999104456so1.pdf [file AEM.03945-12_zam999104456so1.pdf]

**Table S1.** Characteristics of 2009<sup>a</sup> and 2010 sites sampled for Phz<sup>+</sup> strains

| Site ID | GPS coordinates            | Date sampled | Plant sampled | Phz <sup>+</sup> <i>Pseudomonas</i> spp.                   |                        | Approx. mean annual precipitation (mm) | No. Phz <sup>+</sup> strains isolated |
|---------|----------------------------|--------------|---------------|------------------------------------------------------------|------------------------|----------------------------------------|---------------------------------------|
|         |                            |              |               | Population density (logCFU g <sup>-1</sup> root f.w. ± SD) | Colonization frequency |                                        |                                       |
| S16X09  | 46°15'59"N,<br>118°11'15"W | 03/17/09     | Winter wheat  | 6.2 ± 2.1                                                  | 0.3                    | 478                                    | 14                                    |
| S17X09  | 46°17'48"N,<br>118°26'23"W | 03/17/09     | Winter wheat  | 5.6 ± 1.2                                                  | 0.3                    | 352                                    | 24                                    |
| S21X09  | 46°9'49"N,<br>119°42'23"W  | 03/24/09     | Winter wheat  | 6.4 ± 0.9                                                  | 1.0                    | 235                                    | 38                                    |
| S22X09  | 46°7'58"N,<br>119°42'21"W  | 03/24/09     | Winter wheat  | 6.5 ± 1.7                                                  | 0.8                    | 230                                    | 33                                    |
| S23X09  | 46°7'37"N,<br>119°44'20"W  | 03/24/09     | Winter wheat  | 6.1 ± 0.8                                                  | 0.8                    | 246                                    | 9                                     |
| S24X09  | 46°7'38"N,<br>119°51'21"W  | 03/24/09     | Winter wheat  | 5.6 ± 1.3                                                  | 0.9                    | 246                                    | 27                                    |
| S25X09  | 46°1'36"N,<br>120°15'53"W  | 03/24/09     | Winter wheat  | 7.0 ± 1.3                                                  | 1.0                    | 348                                    | 41                                    |
| S26X09  | 46°6'8"N,<br>119°36'20"W   | 03/24/09     | Winter wheat  | 5.5 ± 0.8                                                  | 0.8                    | 226                                    | 11                                    |
| S27X09  | 46°9'27"N,<br>119°36'7"W   | 03/24/09     | Winter wheat  | 6.9 ± 0.9                                                  | 0.9                    | 232                                    | 22                                    |
| S31X09  | 46°48'39"N,<br>117°37'12"W | 04/21/09     | Winter wheat  | 5.5 ± 1.8                                                  | 0.8                    | 448                                    | 12                                    |
| S33X09  | 46°51'15"N,<br>118°20'10"W | 04/21/09     | Winter wheat  | 5.2 ± 1.3                                                  | 0.9                    | 309                                    | 18                                    |
| S34X09  | 47°0'4"N,<br>118°20'48"W   | 04/21/09     | Winter wheat  | 5.7 ± 1.6                                                  | 1.0                    | 290                                    | 16                                    |
| S35X09  | 47°7'26"N,                 | 04/21/09     | Winter wheat  | 5.7 ± 2.0                                                  | 0.8                    | 275                                    | 4                                     |

118°36'4"W

|         |                            |          |                                                     |           |     |     |    |
|---------|----------------------------|----------|-----------------------------------------------------|-----------|-----|-----|----|
| S36X09  | 46°54'45"N,<br>118°33'58"W | 04/21/09 | Winter wheat                                        | 6.2 ± 1.3 | 1.0 | 261 | 42 |
| S37X09  | 46°47'41"N,<br>118°33'28"W | 04/21/09 | Winter wheat                                        | 6.0 ± 1.5 | 0.9 | 259 | 4  |
| S38X09  | 46°47'46"N,<br>118°40'19"W | 04/21/09 | Winter wheat                                        | 6.4 ± 0.9 | 0.9 | 243 | 2  |
| S39X09  | 46°47'35"N,<br>118°43'48"W | 04/21/09 | Winter wheat                                        | 5.9 ± 1.4 | 0.8 | 237 | 19 |
| S41X09  | 47°1'49"N,<br>117°21'47"W  | 05/04/09 | Winter wheat                                        | 6.0 ± 1.3 | 0.4 | 520 | 30 |
| S42X09  | 47°25'12"N,<br>117°21'52"W | 05/04/09 | Winter wheat                                        | 4.5 ± 1.2 | 0.6 | 475 | 1  |
| S44X09  | 47°39'28"N,<br>117°56'54"W | 05/04/09 | Winter wheat                                        | 4.0 ± 0.9 | 0.6 | 441 | 34 |
| S46X09  | 47°43'43"N,<br>118°43'23"W | 05/04/09 | Winter wheat                                        | 6.9 ± 1.1 | 0.8 | 356 | 5  |
| S49X09  | 47°10'39"N,<br>117°52'12"W | 05/04/09 | Winter wheat                                        | 4.1 ± 0.6 | 0.3 | 336 | 11 |
| S63X09  | 45°51'0"N,<br>118°43'7"W   | 06/09/09 | Winter wheat                                        | 5.2 ± 1.1 | 0.9 | 470 | 6  |
| S64X09  | 45°50'31"N,<br>118°47'47"W | 06/09/09 | Winter wheat                                        | 5.1 ± 0.9 | 0.9 | 405 | 2  |
| S65X09  | 45°47'29"N,<br>118°48'28"W | 06/09/09 | Winter wheat                                        | 5.6 ± 0.8 | 0.9 | 374 | 17 |
| S611X09 | 46°37'40"N,<br>118°43'54"W | 06/09/09 | Winter wheat                                        | 4.1 ± 0.6 | 0.8 | 250 | 4  |
| 1X09    | 47°8'28"N,<br>118°29'40"W  | 06/15/09 | Blue wildrye<br>( <i>Elymus glaucus</i><br>Buckley) | 5.8 ± 1.1 | 1.0 | 295 | 2  |
| 3X09    | 47°8'28"N,<br>118°29'40"W  | 06/15/09 | Wild grass<br>( <i>Agropyron cristatum</i> )        | 4.9 ± 1.4 | 0.8 | 295 | 2  |

|                      |                            |          |                                                    |           |     |     |     |
|----------------------|----------------------------|----------|----------------------------------------------------|-----------|-----|-----|-----|
| 4X09                 | 47°8'28"N,<br>118°29'40"W  | 06/15/09 | Cheatgrass<br>( <i>Bromus tectorum</i> L.)         | 4.2 ± 1.1 | 1.0 | 295 | 3   |
| 41X10 <sup>c</sup>   | 46°47'54"N,<br>118°29'32"W | 06/15/10 | Needle & thread grass<br>( <i>Stipa comata</i> L.) | 3.7 ± 0.9 | 0.6 | 264 | 10  |
| 42X10 <sup>c</sup>   | 46°47'54"N,<br>118°29'32"W | 06/15/10 | Spring wheat                                       | 5.6 ± 1.0 | 1.0 | 264 | 18  |
| 43X10 <sup>c</sup>   | 46°47'54"N,<br>118°29'32"W | 06/15/10 | Common yarrow<br>( <i>Achillea millefolium</i> L.) | 4.9 ± 1.0 | 0.8 | 264 | 16  |
| <i>Total strains</i> |                            |          |                                                    |           |     |     | 497 |

---

<sup>a</sup> Site characteristics are extracted from Mavrodi, DV et al. 2012 Appl. Environ. Microbiol. and Mavrodi, OV et al. 2012 Appl. Environ. Microbiol.

<sup>b</sup> Approximate mean annual precipitation (1971-2000) from PRISM Climate Group data mapped using ArcGIS v.9.3 (Esri, Inc.)

<sup>c</sup> 2010 sites were sampled as a side-by-side comparison of strains colonizing spring wheat and two native plants bordering the field in undisturbed soil
