# Supplementary material
Source: PubMed Central journal article supplement (PMC3675913)
Supplement: AEM.03945-12_zam999104456so2.pdf [file AEM.03945-12_zam999104456so2.pdf]

**Table S2.** Total number of Phz<sup>+</sup> *Pseudomonas* spp. strains isolated from sampled sites

| Site or host | No. of unique BOX-PCR genotypes detected | No. strains belonging to Phz <sup>+</sup> species isolated |                    |                      |                     | Total          |
|--------------|------------------------------------------|------------------------------------------------------------|--------------------|----------------------|---------------------|----------------|
|              |                                          | <i>P. aridus</i>                                           | <i>P. cerealis</i> | <i>P. orientalis</i> | <i>P. synxantha</i> |                |
| S16X09       | 1                                        | 0                                                          | 0                  | 14                   | 0                   | 14             |
| S17X09       | 2                                        | 0                                                          | 24                 | 0                    | 0                   | 24             |
| S21X09       | 3                                        | 0                                                          | 37                 | 1                    | 0                   | 38             |
| S22X09       | 2                                        | 23                                                         | 0                  | 10                   | 0                   | 33             |
| S23X09       | 3                                        | 0                                                          | 0                  | 6                    | 3                   | 9              |
| S24X09       | 5                                        | 1                                                          | 10                 | 16                   | 0                   | 27             |
| S25X09       | 4                                        | 18                                                         | 9                  | 0                    | 14                  | 41             |
| S26X09       | 3                                        | 0                                                          | 4                  | 7                    | 0                   | 11             |
| S27X09       | 2                                        | 14                                                         | 8                  | 0                    | 0                   | 22             |
| S31X09       | 1                                        | 0                                                          | 0                  | 12                   | 0                   | 12             |
| S33X09       | 2                                        | 17                                                         | 1                  | 0                    | 0                   | 18             |
| S34X09       | 1                                        | 16                                                         | 0                  | 0                    | 0                   | 16             |
| S35X09       | 3                                        | 3                                                          | 1                  | 0                    | 0                   | 4              |
| S36X09       | 4                                        | 38                                                         | 4                  | 0                    | 0                   | 42             |
| S37X09       | 2                                        | 2                                                          | 0                  | 2                    | 0                   | 4              |
| S38X09       | 1                                        | 0                                                          | 0                  | 0                    | 2                   | 2              |
| S39X09       | 5                                        | 16                                                         | 3                  | 0                    | 0                   | 19             |
| S41X09       | 2                                        | 0                                                          | 3                  | 27                   | 0                   | 30             |
| S42X09       | 1                                        | 0                                                          | 0                  | 1                    | 0                   | 1              |
| S44X09       | 4                                        | 0                                                          | 4                  | 30                   | 0                   | 34             |
| S46X09       | 1                                        | 5                                                          | 0                  | 0                    | 0                   | 5              |
| S49X09       | 3                                        | 8                                                          | 2                  | 1                    | 0                   | 11             |
| S63X09       | 2                                        | 0                                                          | 6                  | 0                    | 0                   | 6              |
| S64X09       | 1                                        | 0                                                          | 0                  | 0                    | 2                   | 2              |
| S65X09       | 2                                        | 0                                                          | 17                 | 0                    | 0                   | 17             |
| S611X09      | 1                                        | 0                                                          | 4                  | 0                    | 0                   | 4              |
| 1X09         | 2                                        | 0                                                          | 0                  | 0                    | 1                   | 2 <sup>a</sup> |
| 3X09         | 2                                        | 0                                                          | 0                  | 2                    | 0                   | 2              |
| 4X09         | 3                                        | 0                                                          | 3                  | 0                    | 0                   | 3              |
| 41X10        | 4                                        | 0                                                          | 10                 | 0                    | 0                   | 10             |
| 42X10        | 2                                        | 16                                                         | 2                  | 0                    | 0                   | 18             |
| 43X10        | 2                                        | 0                                                          | 4                  | 12                   | 0                   | 16             |

<sup>a</sup> *Pseudomonas* sp. strain 1209 was also isolated from this site.
