# Supplementary material
Source: PubMed Central journal article supplement (PMC3675913)
Supplement: AEM.03945-12_zam999104456so3.pdf [file AEM.03945-12_zam999104456so3.pdf]

**Table S3.** Distinct phenotypic differences between the four IPNW Phz<sup>+</sup> *Pseudomonas* species identified in this study

| Species <sup>a</sup>                  | Bio-surfactant | PCA production  |               |                  | Substrate utilization |            |             |                            |                 |             |
|---------------------------------------|----------------|-----------------|---------------|------------------|-----------------------|------------|-------------|----------------------------|-----------------|-------------|
|                                       |                | KMB             | LB+2% glucose | PDA <sup>b</sup> | L-Alaninamide         | L-Rhamnose | D-Trehalose | p-Hydroxyphenylacetic acid | Succinamic acid | L-ornithine |
| ' <i>P. aridus</i> '                  | -              | +               | +             | n.d.             | -                     | -          | -           | -                          | +               | v.          |
| ' <i>P. cerealis</i> '                | +              | -               | -             | +                | +                     | -          | +           | +                          | +               | -           |
| Phz <sup>+</sup> <i>P. orientalis</i> | +              | +               | -             | n.d.             | -                     | +          | +           | v.                         | -               | -           |
| Phz <sup>+</sup> <i>P. synxantha</i>  | - <sup>c</sup> | v. <sup>d</sup> | v.            | n.d.             | v.                    | -          | +           | +                          | -               | +           |

<sup>a</sup> No. of strains tested for each phenotype: *P. aridus* = 10 strains, *P. cerealis* = 9 strains, *P. orientalis* = 5 strains and *P. synxantha* = 7 strains (Parejko et al. 2012 Microb. Ecol.).

<sup>b</sup> n.d., not determined

<sup>c</sup> *P. fluorescens* 2-79 produces a viscosin-like biosurfactant (unpublished data)

<sup>d</sup> v. = variable result (one strain positive)
