# Supplementary material
Source: PubMed Central journal article supplement (PMC3675913)
Supplement: AEM.03945-12_zam999104456so5.pdf [file AEM.03945-12_zam999104456so5.pdf]

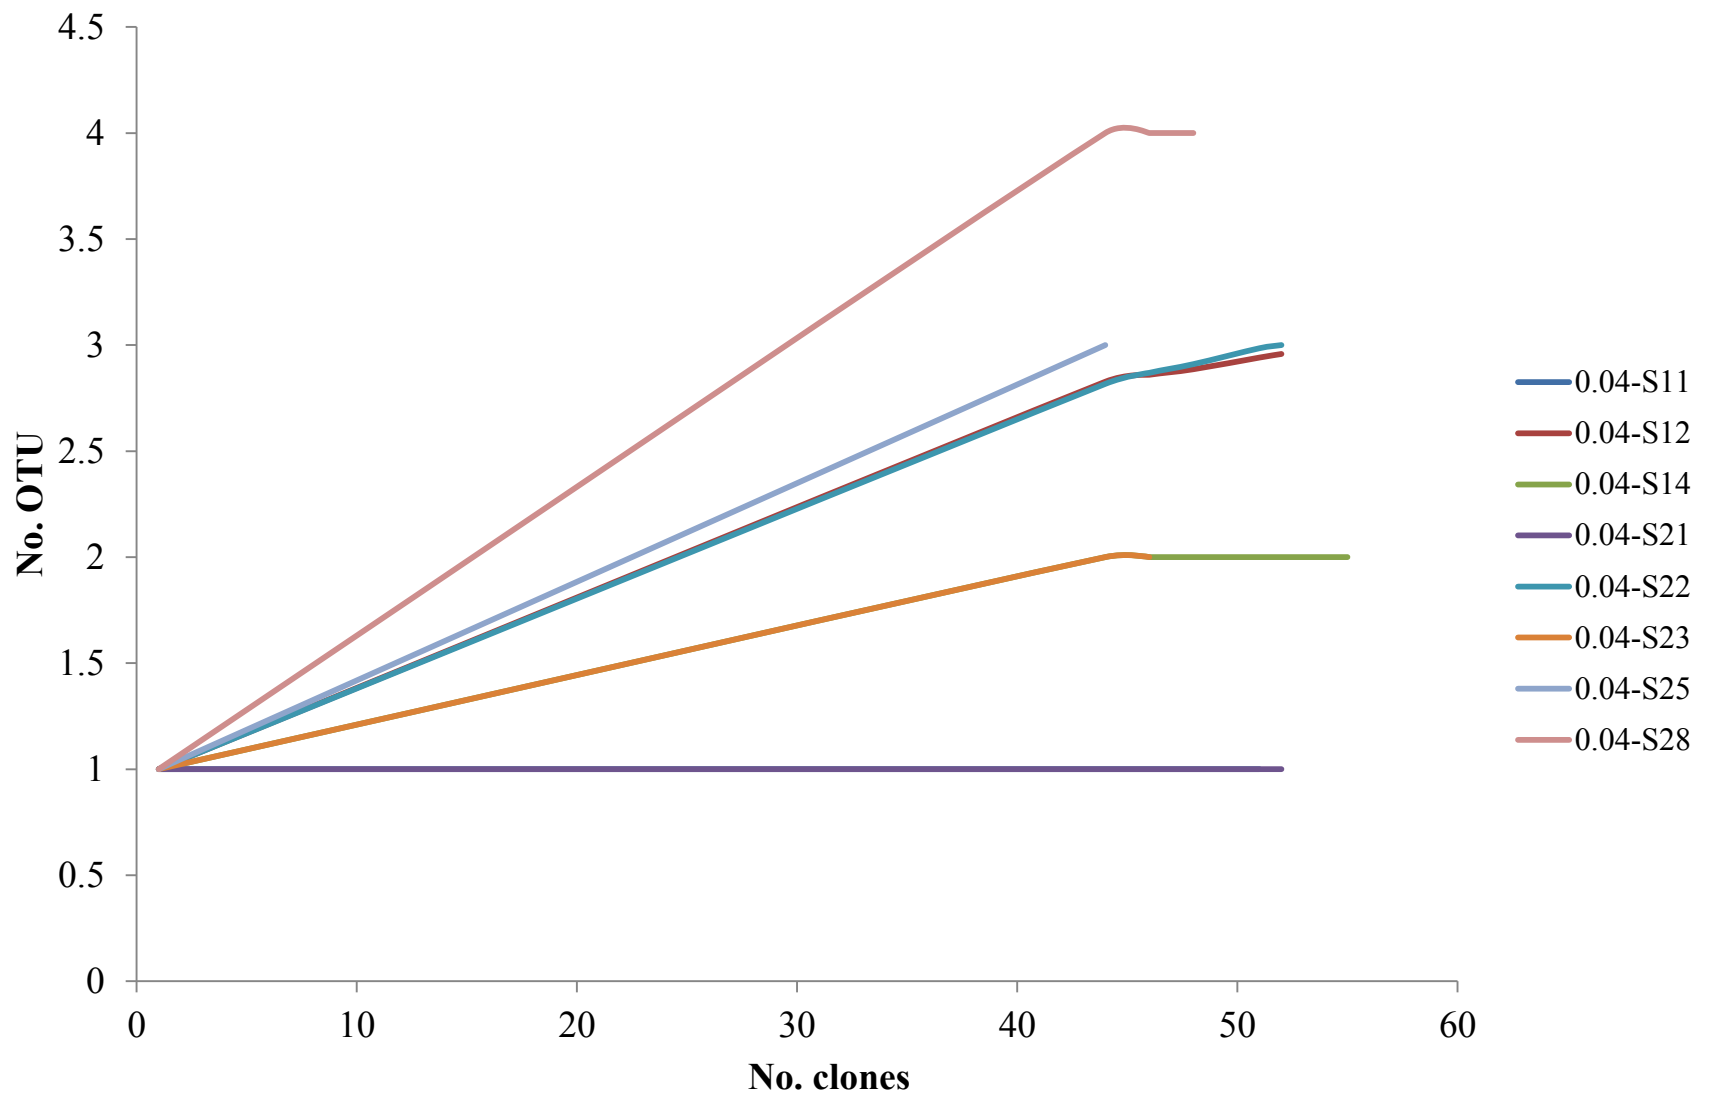

**Fig. S1.** Rarefaction curves for the  $Phz^+$  communities from the eight sites sampled for total rhizosphere DNA. *phzF* allele OTUs were assigned at a phylogenetic cut-off of 0.04 substitutions site<sup>-1</sup>.
