# Supplementary material
Source: PubMed Central journal article supplement (PMC3675913)
Supplement: AEM.03945-12_zam999104456so6.pdf [file AEM.03945-12_zam999104456so6.pdf]

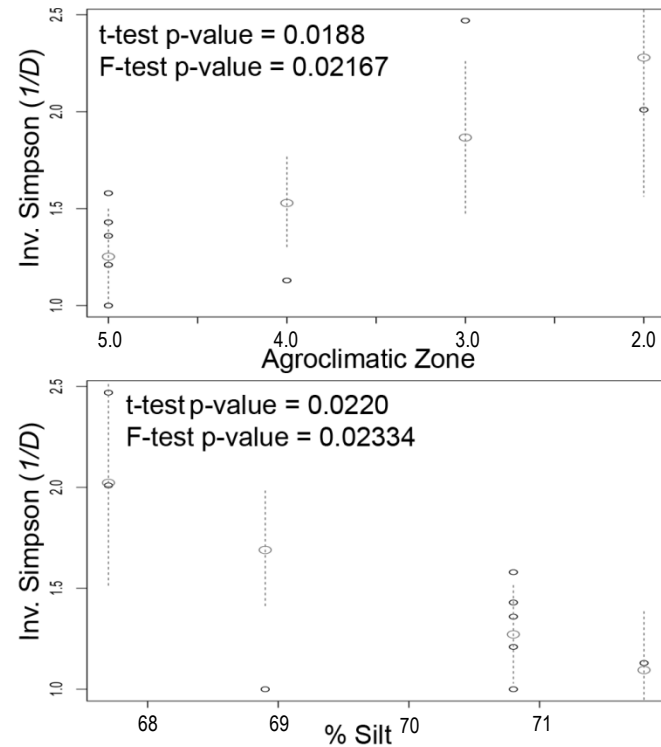

**Fig. S2.** The effect of soil % silt and agroclimatic zone on the diversity of *phzF*-containing *Pseudomonas* spp. communities at nine sampled IPNW sites. Diversity is represented as a function of the inverse Simpson diversity index ( $1/D$ ). Confidence intervals are shown as dotted lines and the plots were calculated in BiodiversityR.
